# Supplementary material for: Comparison of Thaumarchaeotal populations from four deep sea basins
Source: PubMed Central journal article supplement — FEMS Microbiol Ecol. 2017 Oct 3;93(11):fix128. doi: 10.1093/femsec/fix128 (PMC5812500; doi:10.1093/femsec/fix128), 2017-10-03
Supplement: fix128_supp.pdf [file fix128_supp.pdf]

# Supplemental for: Comparison of Thaumarchaeotal Populations from Four Deep Sea Basins

Stephen M. Techtman<sup>1</sup>, Nagissa Mahmoudi<sup>3</sup>, Kendall T. Whitt<sup>3</sup>, Maria Fernanda Campa<sup>4,5</sup>, Julian L. Fortney<sup>3,4</sup>, Dominique C. Joyner<sup>3,4</sup>, Terry C. Hazen<sup>2,3,4,5,6,7,8\*</sup>

<sup>1</sup>Department of Biological Sciences, Michigan Technological University, Houghton MI, USA

<sup>2</sup>Department of Earth & Planetary Sciences, University of Tennessee, Knoxville, TN, USA

<sup>3</sup>Department of Civil & Environmental Engineering, University of Tennessee, Knoxville, TN, USA

<sup>4</sup>Center for Environmental Biotechnology, University of Tennessee, Knoxville, TN USA

<sup>5</sup>Bredesen Center, University of Tennessee, Knoxville, TN USA

<sup>6</sup>Biosciences Division, Oak Ridge National Laboratory, Oak Ridge, TN USA

<sup>7</sup>Department of Microbiology, University of Tennessee, Knoxville, TN USA

<sup>8</sup>Institute for a Secure and Sustainable Environment, University of Tennessee, Knoxville, TN USA

Running Title: Abundance and Diversity of Thaumarchaeota

Subject Category: Microbial ecology and functional diversity of natural habitats

Keywords: Thaumarchaeota, qPCR, Minimum Entropy Decomposition, Biogeography

\* Corresponding authors:

Terry C. Hazen - [tchazen@utk.edu](mailto:tchazen@utk.edu)

Stephen M. Techtmann – [smtechtm@mtu.edu](mailto:smtechtm@mtu.edu)

Supplementary Table 1: Environmental variables for each sample collected from each basin.

| SampleID | Basin   | Depth (m) | Temperature (°C) | DO (mg/L) | Salinity (psu) | Nitrite (µM) | Inorganic Phosphate (µM) | Silicate (µM) | Ammonia (µM) | Nitrate (µM) | TOC (mg/L) |
|----------|---------|-----------|------------------|-----------|----------------|--------------|--------------------------|---------------|--------------|--------------|------------|
| GAB05NS  | GAB     | 70        | 18.941           | 7.90      | 35.703         | <0.01        | 0.035                    | <0.065        | <0.02        | 0.0          | 1.14       |
| GAB0513  | GAB     | 600       | 8.308            | 7.59      | 34.552         | <0.01        | 1.3                      | 6.487         | <0.02        | 16.9         | 0.70       |
| GAB0523  | GAB     | 1000      | 3.949            | 6.22      | 34.418         | <0.01        | 2.111                    | 41.631        | <0.02        | 28.0         | 0.97       |
| GAB05NB  | GAB     | 1500      | 2.715            | 5.49      | 34.583         | <0.01        | 2.442                    | 73.951        | <0.02        | 31.7         | 1.03       |
| GAB09NS  | GAB     | 60        | 18.748           | 7.96      | 35.57          | <0.01        | 0.05                     | 0.065         | <0.02        | 0.0          | 0.84       |
| GAB0913  | GAB     | 670       | 8.276            | 7.61      | 34.548         | <0.01        | 1.397                    | 6.837         | <0.02        | 18.9         | 0.91       |
| GAB0923  | GAB     | 1330      | 2.955            | 5.63      | 34.52          | <0.01        | 2.445                    | 63.684        | <0.02        | 31.4         | 0.73       |
| GAB09NB  | GAB     | 1901      | 2.398            | 5.49      | 34.691         | <0.01        | 2.018                    | 57.354        | <0.02        | 24.9         | 0.64       |
| GAB14NS  | GAB     | 185       | 12.754           | 8.14      | 35.168         | <0.01        | 0.415                    | 0.312         | <0.02        | 4.9          | 1.13       |
| GAB1413  | GAB     | 699       | 7.939            | 7.29      | 34.52          | <0.01        | 1.508                    | 9.184         | <0.02        | 19.7         | 0.77       |
| GAB1423  | GAB     | 990       | 4.539            | 6.34      | 34.394         | <0.01        | 1.946                    | 31.201        | <0.02        | 23.3         | 0.94       |
| GAB14NB  | GAB     | 1472      | 2.699            | 5.40      | 34.592         | <0.01        | 2.293                    | 60.547        | <0.02        | 27.9         | 0.97       |
| GAB16NS  | GAB     | 200       | 12.574           | 7.98      | 35.123         | <0.01        | 0.492                    | 0.963         | <0.02        | 5.4          | 1.08       |
| GAB1613  | GAB     | 700       | 8.221            | 7.45      | 34.542         | <0.01        | 1.437                    | 7.71          | <0.02        | 18.3         | 0.78       |
| GAB1623  | GAB     | 1650      | 2.621            | 5.45      | 34.624         | <0.01        | 2.436                    | 75.647        | <0.02        | 29.1         | 1.20       |
| GAB16NB  | GAB     | 1994      | 2.275            | 5.59      | 34.71          | <0.01        | 2.385                    | 90.79         | <0.02        | 33.1         | 0.77       |
| GAB27NS  | GAB     | 60        | 19.928           | 7.81      | 35.734         | <0.01        | 0.013                    | 0.42          | <0.02        | 0.0          | 1.15       |
| GAB2713  | GAB     | 200       | 13.374           | 7.95      | 35.296         | <0.01        | 0.322                    | 0.459         | <0.02        | 3.1          | 0.77       |
| GAB2723  | GAB     | 650       | 7.516            | 6.96      | 34.495         | <0.01        | 1.615                    | 11.977        | <0.02        | 23.6         | 1.11       |
| GAB27NB  | GAB     | 974       | 4.337            | 6.21      | 34.397         | <0.01        | 2.226                    | 39.526        | <0.02        | 31.7         | 0.88       |
| CMS01NS  | Caspian | 50        | 11.258           | 8.06      | 11.309         | 0.105        | 0.037                    | 0.243         | 0.044        | 0.2          | 5.74       |
| CMS0113  | Caspian | 198       | 6.672            | 4.14      | 11.318         | 0.039        | 0.721                    | 37.044        | 0.02         | 10.7         | 6.45       |
| CMS0123  | Caspian | 401       | 6.208            | 1.73      | 11.379         | 0.036        | 1.52                     | 69.402        | 0.02         | 12.4         | 6.32       |
| CMS01NB  | Caspian | 575       | 6.088            | 0.53      | 11.404         | 0.043        | 1.65                     | 84.724        | 0.03         | 3.8          | 6.14       |

|         |             |      |        |       |        |       |       |        |       |      |      |
|---------|-------------|------|--------|-------|--------|-------|-------|--------|-------|------|------|
| CMS02NS | Caspian     | 30   | 17.747 | 8.31  | 11.156 | 0.047 | 0.03  | 2.488  | 0.02  | 0.2  | 7.42 |
| CMS0223 | Caspian     | 101  | 7.34   | 5.41  | 11.281 | 0.028 | 0.271 | 26.932 | 0.02  | 5.3  | 6.87 |
| CMS02NB | Caspian     | 190  | 6.595  | 3.50  | 11.321 | 0.036 | 0.684 | 38.857 | 0.02  | 10.0 | 6.68 |
| CMS03NS | Caspian     | 30   | 22.237 | 8.49  | 11.219 | 0.025 | 0.019 | 1.51   | 0.02  | 0.1  | 7.57 |
| CMS0312 | Caspian     | 73   | 9.127  | 6.34  | 11.288 | 0.028 | 0.058 | 11.419 | 0.02  | 1.4  | 6.57 |
| CMS03NB | Caspian     | 130  | 6.96   | 4.79  | 11.304 | 0.023 | 0.406 | 30.376 | 0.02  | 6.7  | 6.60 |
| CMS04NS | Caspian     | 30   | 24.083 | 8.46  | 11.262 | 0.016 | 0.024 | 1.562  | 0.02  | 0.1  | 7.93 |
| CMS0423 | Caspian     | 60   | 10.984 | 7.41  | 11.291 | 0.025 | 0.012 | 1.831  | 0.026 | 0.8  | 7.72 |
| CMS04NB | Caspian     | 100  | 7.155  | 5.20  | 11.299 | 0.012 | 0.186 | 22.999 | 0.02  | 4.1  | 7.43 |
| CMS05NS | Caspian     | 33   | 21     | 8.47  | 11.291 | 0.011 | 0.016 | 1.623  | 0.02  | 0.1  | 6.85 |
| CMS0513 | Caspian     | 140  | 7.114  | 5.12  | 11.287 | 0.017 | 0.25  | 26.958 | 0.02  | 5.2  | 6.67 |
| CMS0523 | Caspian     | 260  | 6.581  | 3.62  | 11.329 | 0.014 | 0.651 | 37.222 | 0.02  | 9.5  | 6.88 |
| CMS05NB | Caspian     | 390  | 6.262  | 1.43  | 11.373 | 0.034 | 1.367 | 62.929 | 0.02  | 12.3 | 6.90 |
| CMS06NS | Caspian     | 30   | 25.107 | 8.49  | 11.23  | 0.045 | 0.029 | 5.059  | 0.02  | 0.2  | 7.50 |
| CMS06NB | Caspian     | 58   | 7.036  | 6.40  | 11.373 | 0.035 | 0.102 | 23.163 | 0.02  | 1.6  | 7.43 |
| NDMS001 | Eastern_Med | 10   | 26.334 | 9.32  | 39.493 | <0.01 | 0.171 | 0.576  | 0.02  | 0.0  | 1.21 |
| NDMS002 | Eastern_Med | 495  | 13.963 | 6.39  | 38.883 | <0.01 | 0.437 | 8.81   | 0.02  | 6.8  | 0.89 |
| NDMS003 | Eastern_Med | 171  | 16.044 | 8.30  | 39.14  | <0.01 | 0.16  | 1.388  | 0.02  | 1.9  | 0.96 |
| NDMS004 | Eastern_Med | 346  | 14.48  | 6.92  | 38.994 | <0.01 | 0.375 | 6.649  | 0.02  | 6.3  | 1.48 |
| NDMS006 | Eastern_Med | 1210 | 13.788 | 5.93  | 38.826 | <0.01 | 0.371 | 9.812  | 0.108 | 6.0  | 0.85 |
| NDMS007 | Eastern_Med | 824  | 13.772 | 6.28  | 38.828 | <0.01 | 0.381 | 9.635  | 0.02  | 6.5  | 0.68 |
| NDMS008 | Eastern_Med | 250  | 15.565 | 7.95  | 39.148 | <0.01 | 0.24  | 2.735  | 0.02  | 3.4  | 1.06 |
| NDMS009 | Eastern_Med | 50   | 19.199 | 10.49 | 38.629 | <0.01 | 0.104 | 0.431  | 0.02  | 0.0  | 1.19 |
| NDMS011 | Eastern_Med | 972  | 13.746 | 6.13  | 38.831 | <0.01 | 0.354 | 9.568  | 0.02  | 5.9  | 0.74 |
| NDMS012 | Eastern_Med | 665  | 13.84  | 6.39  | 38.851 | <0.01 | 0.367 | 8.97   | 0.028 | 6.6  | 0.70 |
| NDMS013 | Eastern_Med | 250  | 15.535 | 8.04  | 39.158 | <0.01 | 0.168 | 2.607  | 0.02  | 3.4  | 0.74 |
| NDMS014 | Eastern_Med | 50   | 19.281 | 11.55 | 38.562 | <0.01 | 0.063 | 0.413  | 0.02  | 0.0  | 1.12 |

|         |             |      |         |       |         |       |        |       |        |        |      |
|---------|-------------|------|---------|-------|---------|-------|--------|-------|--------|--------|------|
| NDMS016 | Eastern_Med | 1055 | 13.759  | 6.88  | 38.83   | <0.01 | 0.327  | 9.985 | 0.02   | 6.4    | 0.75 |
| NDMS017 | Eastern_Med | 720  | 13.815  | 6.40  | 38.839  | <0.01 | 0.338  | 9.327 | 0.131  | 6.7    | 0.73 |
| NDMS018 | Eastern_Med | 200  | 15.883  | 8.25  | 39.175  | <0.01 | 0.069  | 1.355 | 0.02   | 2.1    | 0.99 |
| NDMS019 | Eastern_Med | 60   | 17.49   | 10.13 | 38.592  | <0.01 | 0.033  | 0.511 | 0.02   | 0.0    | 1.09 |
| NDMS021 | Eastern_Med | 742  | 13.747  | 6.27  | 38.832  | <0.01 | 0.298  | 9.737 | 0.02   | 6.3    | 0.83 |
| NDMS022 | Eastern_Med | 511  | 13.935  | 6.63  | 38.877  | <0.01 | 0.299  | 8.78  | 0.02   | 7.0    | 0.87 |
| NDMS023 | Eastern_Med | 200  | 15.809  | 8.15  | 39.158  | <0.01 | 0.057  | 1.836 | 0.02   | 2.6    | 0.92 |
| NDMS024 | Eastern_Med | 50   | 18.999  | 10.54 | 38.6    | <0.01 | 0.008  | 0.377 | 0.02   | 0.0    | 1.24 |
| ENV14NB | Central_Med | 812  | 13.6717 | 5.89  | 38.7417 |       | 0.196  | 7.593 | 0.042  | 5.1    | 0.92 |
| ENV1423 | Central_Med | 549  | 13.7437 | 5.73  | 38.7564 |       | 0.224  | 7.362 | <0.019 | 5.7    | 0.86 |
| ENV1413 | Central_Med | 125  | 15.9371 | 7.05  | 38.5198 |       | <0.008 | 0.6   | <0.019 | 0.1    | 0.79 |
| ENV14NS | Central_Med | 5    | 17.5341 | 7.37  | 38.471  |       | <0.008 | 0.711 | <0.019 | <0.009 | 0.67 |
| ENV19NB | Central_Med | 1178 | 13.6988 | 4.19  | 38.7373 |       | 0.167  | 7.443 | <0.019 | 4.8    | 1.07 |
| ENV1923 | Central_Med | 798  | 13.7063 | 4.08  | 38.7418 |       | 0.197  | 7.472 | <0.019 | 5.4    | 0.85 |
| ENV1913 | Central_Med | 173  | 15.0958 | 4.41  | 38.8935 |       | <0.008 | 0.702 | <0.019 | 0.7    | 0.71 |
| ENV19NS | Central_Med | 5    | 17.6931 | 5.12  | 38.4818 |       | <0.008 | 0.449 | <0.019 | <0.009 | 0.66 |
| ENV10NB | Central_Med | 1792 | 13.7592 | 6.01  | 38.7312 |       | 0.146  | 7.584 | <0.019 | 4.7    | 0.85 |
| ENV1023 | Central_Med | 1207 | 13.7243 | 5.96  | 38.7357 |       | 0.175  | 7.38  | <0.019 | 4.9    | 0.79 |
| ENV1013 | Central_Med | 86   | 16.7904 | 7.15  | 38.5753 |       | <0.008 | 0.522 | 0.024  | 0.4    | 0.58 |
| ENV10NS | Central_Med | 5    | 17.0542 | 7.38  | 38.4371 |       | <0.008 | 0.677 | <0.019 | <0.009 | 0.64 |
| ENV8NB  | Central_Med | 2195 | 13.8089 | 6.05  | 38.7284 |       | 0.167  | 7.435 | 0.097  | 4.6    | 0.91 |
| ENV823  | Central_Med | 1479 | 13.7548 | 5.99  | 38.7359 |       | 0.084  | 4.171 | <0.019 | 2.7    | 0.92 |
| ENV813  | Central_Med | 128  | 15.8078 | 6.90  | 38.6665 |       | <0.008 | 1.081 | <0.019 | 1.1    | 0.63 |
| ENV8NS  | Central_Med | 5    | 16.7494 | 7.43  | 38.1657 |       | 0.008  | 0.724 | <0.019 | 0.0    | 0.59 |

Supplementary Table 2: qPCR gene copy numbers for each sample

|          | Sample   | prok_ml  | Bact_ml  | Arch_ml  | Arch_amoA_ml |
|----------|----------|----------|----------|----------|--------------|
| Caspian  | CMS01W13 | 3.00E+06 | 2.85E+06 | 1.58E+05 | 2.32E+05     |
|          | CMS01W23 | 4.17E+06 | 3.79E+06 | 3.77E+05 | 3.92E+05     |
|          | CMS01W23 | 4.56E+06 | 4.17E+06 | 3.84E+05 | 4.21E+05     |
|          | CMS01WNB | 3.13E+08 | 3.12E+08 | 8.18E+05 | 4.86E+05     |
|          | CMS01WNB | 6.40E+07 | 6.31E+07 | 8.67E+05 | 6.13E+05     |
|          | CMS01WNS | 2.50E+08 | 2.48E+08 | 1.54E+06 | 9.79E+05     |
|          | CMS01WNS | 2.67E+08 | 2.65E+08 | 1.76E+06 | 8.11E+05     |
|          | CMS02W23 | 2.14E+07 | 2.14E+07 | 6.98E+04 | 1.84E+05     |
|          | CMS02W23 | 8.71E+07 | 8.70E+07 | 9.40E+04 | 2.37E+05     |
|          | CMS02WNB | 3.76E+07 | 3.69E+07 | 7.42E+05 | 1.02E+06     |
|          | CMS02WNB | 4.96E+07 | 4.84E+07 | 1.16E+06 | 1.47E+06     |
|          | CMS02WNS | 2.33E+07 | 2.32E+07 | 7.11E+04 | 1.21E+05     |
|          | CMS02WNS | 1.47E+07 | 1.46E+07 | 7.56E+04 | 1.45E+05     |
|          | CMS03W12 | 5.44E+07 | 5.44E+07 | 6.58E+03 | 2.25E+04     |
|          | CMS03W12 | 1.05E+08 | 1.05E+08 | 6.96E+03 | 2.27E+04     |
|          | CMS03WNS | 9.75E+07 | 9.42E+07 | 3.27E+06 | 3.26E+06     |
|          | CMS03WNS | 1.17E+08 | 1.15E+08 | 1.55E+06 | 3.26E+06     |
|          | CMS04W23 | 5.14E+07 | 5.14E+07 | 3.90E+04 | 3.64E+04     |
|          | CMS04W23 | 6.63E+07 | 6.63E+07 | 2.99E+04 | 3.76E+04     |
|          | CMS04WNB | 4.32E+07 | 4.18E+07 | 1.34E+06 | 1.23E+06     |
|          | CMS04WNB | 2.62E+07 | 2.48E+07 | 1.40E+06 | 1.11E+06     |
|          | CMS04WNS | 1.10E+09 | 1.09E+09 | 1.58E+06 | 3.13E+03     |
|          | CMS05W13 | 6.28E+07 | 6.28E+07 | 2.52E+04 | 2.00E+03     |
|          | CMS05W13 | 1.90E+07 | 1.90E+07 | 2.31E+04 | 3.02E+04     |
|          | CMS05W23 | 2.58E+07 | 2.43E+07 | 1.49E+06 | 1.23E+06     |
|          | CMS05W23 | 3.40E+07 | 3.24E+07 | 1.55E+06 | 1.02E+06     |
|          | CMS05WNB | 2.37E+07 | 2.26E+07 | 1.06E+06 | 1.01E+06     |
|          | CMS05WNB | 1.80E+07 | 1.59E+07 | 2.09E+06 | 1.12E+06     |
|          | CMS05WNS | 2.20E+08 | 2.18E+08 | 1.82E+06 | 9.21E+05     |
|          | CMS05WNS | 2.24E+08 | 2.23E+08 | 1.68E+06 | 1.07E+06     |
|          | CMS06WNB | 4.95E+07 | 4.72E+07 | 2.29E+06 | 1.33E+06     |
|          | CMS06WNB | 3.72E+07 | 3.48E+07 | 2.42E+06 | 1.31E+06     |
| CMS06WNS | 2.42E+08 | 2.42E+08 | 5.20E+04 | 9.52E+04 |              |
| CMS06WNS | 2.26E+08 | 2.26E+08 | 5.09E+04 | 1.40E+05 |              |

# Central Mediterranean

|               |          |          |          |          |
|---------------|----------|----------|----------|----------|
| ENV10CTDUTK13 | 4.84E+07 | 4.17E+07 | 6.76E+06 | 5.11E+04 |
| ENV10CTDUTK13 | 7.10E+07 | 6.30E+07 | 8.05E+06 | 7.74E+04 |
| ENV10CTDUTK23 | 3.03E+06 | 4.20E+05 | 2.61E+06 | 3.96E+02 |
| ENV10CTDUTK23 | 2.77E+06 | 1.87E+05 | 2.59E+06 | 1.34E+03 |
| ENV10CTDUTKNB | 1.22E+07 | 1.28E+06 | 1.09E+07 | 1.07E+03 |
| ENV10CTDUTKNB | 1.15E+07 | 1.13E+06 | 1.04E+07 | 3.39E+02 |
| ENV10CTDUTKNS | 5.26E+07 | 4.56E+07 | 7.02E+06 | 1.67E+03 |
| ENV10CTDUTKNS | 3.00E+07 | 2.35E+07 | 6.52E+06 | 2.43E+02 |
| ENV14CTDUTK13 | 1.62E+07 | 9.41E+06 | 6.82E+06 | 3.98E+04 |
| ENV14CTDUTK13 | 2.05E+07 | 1.14E+07 | 9.05E+06 | 6.89E+04 |
| ENV14CTDUTK23 | 1.43E+08 | 1.37E+08 | 6.28E+06 | 1.04E+04 |
| ENV14CTDUTK23 | 3.85E+07 | 3.31E+07 | 5.36E+06 | 2.73E+04 |
| ENV14CTDUTKNB | 8.96E+05 | 1.35E+05 | 7.60E+05 | 2.10E+02 |
| ENV14CTDUTKNB | 8.95E+05 | 1.50E+05 | 7.45E+05 | 3.75E+02 |
| ENV14CTDUTKNS | 5.49E+07 | 5.41E+07 | 7.48E+05 | 1.45E+02 |
| ENV19CTDUTK13 | 6.43E+07 | 5.84E+07 | 5.82E+06 | 2.05E+04 |
| ENV19CTDUTK13 | 5.70E+07 | 5.19E+07 | 5.09E+06 | 1.96E+04 |
| ENV19CTDUTK23 | 5.38E+07 | 4.98E+07 | 3.97E+06 | 2.07E+04 |
| ENV19CTDUTK23 | 6.26E+07 | 5.85E+07 | 4.11E+06 | 3.11E+04 |
| ENV19CTDUTKNB | 8.48E+06 | 6.02E+06 | 2.46E+06 | 2.10E+04 |
| ENV19CTDUTKNB | 7.48E+06 | 4.89E+06 | 2.59E+06 | 2.97E+03 |
| ENV19CTDUTKNS | 3.13E+06 | 2.53E+06 | 6.02E+05 | 5.90E+01 |
| ENV8CTDUTK13  | 1.06E+07 | 1.01E+06 | 9.56E+06 | 2.30E+03 |
| ENV8CTDUTK13  | 9.52E+06 | 8.48E+05 | 8.67E+06 | 1.53E+03 |
| ENV8CTDUTK23  | 7.13E+06 | 5.56E+06 | 1.57E+06 | 1.18E+04 |
| ENV8CTDUTK23  | 6.97E+06 | 5.21E+06 | 1.75E+06 | 1.18E+04 |
| ENV8CTDUTKNB  | 3.28E+07 | 5.24E+06 | 2.76E+07 | 8.97E+02 |
| ENV8CTDUTKNB  | 3.32E+07 | 2.97E+06 | 3.03E+07 | 9.88E+02 |
| ENV8CTDUTKNS  | 1.89E+07 | 1.09E+07 | 8.05E+06 | 1.34E+05 |
| ENV8CTDUTKNS  | 1.80E+07 | 1.04E+07 | 7.59E+06 | 1.31E+05 |

# Great Australian Bight

|         |          |          |          |          |
|---------|----------|----------|----------|----------|
| GAB0513 | 9.14E+07 | 8.53E+07 | 6.14E+06 | 2.24E+04 |
| GAB0513 | 9.92E+07 | 9.15E+07 | 7.65E+06 | 4.08E+04 |
| GAB0523 | 4.37E+06 | 2.03E+06 | 2.34E+06 | 9.14E+03 |
| GAB0523 | 1.39E+07 | 2.07E+06 | 1.18E+07 | 4.41E+03 |
| GAB05NB | 4.93E+07 | 4.90E+06 | 4.44E+07 | 1.37E+04 |
| GAB05NB | 1.24E+07 | 2.98E+06 | 9.38E+06 | 1.14E+04 |
| GAB05NS | 3.99E+07 | 4.30E+05 | 3.94E+07 | 5.48E+03 |
| GAB05NS | 1.83E+07 | 8.04E+05 | 1.75E+07 | 4.89E+03 |
| GAB0913 | 4.88E+07 | 3.52E+07 | 1.36E+07 | 3.25E+03 |
| GAB0923 | 1.02E+08 | 6.41E+06 | 9.57E+07 | 3.25E+05 |
| GAB0923 | 1.78E+08 | 5.78E+06 | 1.73E+08 | 3.22E+05 |
| GAB09NB | 2.65E+07 | 6.07E+06 | 2.04E+07 | 1.18E+04 |
| GAB09NB | 2.93E+07 | 5.38E+06 | 2.39E+07 | 1.79E+04 |
| GAB09NS | 4.99E+08 | 4.60E+08 | 3.92E+07 | 3.70E+03 |
| GAB09NS | 6.14E+08 | 5.85E+08 | 2.83E+07 | 4.95E+03 |
| GAB1413 | 1.70E+08 | 7.35E+07 | 9.67E+07 | 2.32E+06 |
| GAB1413 | 2.20E+08 | 8.78E+07 | 1.32E+08 | 2.14E+06 |
| GAB1423 | 2.70E+08 | 2.95E+06 | 2.67E+08 | 4.01E+05 |
| GAB1423 | 2.91E+08 | 3.16E+06 | 2.88E+08 | 3.83E+05 |
| GAB14NB | 3.51E+07 | 1.92E+07 | 1.59E+07 | 4.13E+04 |
| GAB14NB | 5.03E+07 | 2.15E+07 | 2.87E+07 | 4.18E+04 |
| GAB14NS | 1.30E+08 | 4.21E+07 | 8.82E+07 | 7.05E+03 |
| GAB14NS | 7.66E+07 | 2.84E+07 | 4.82E+07 | 6.70E+03 |
| GAB1613 | 1.86E+08 | 8.10E+06 | 1.78E+08 | 3.28E+06 |
| GAB1613 | 1.86E+08 | 1.31E+07 | 1.73E+08 | 3.00E+06 |
| GAB1623 | 8.32E+07 | 1.21E+07 | 7.11E+07 | 1.29E+05 |
| GAB1623 | 7.92E+07 | 1.67E+07 | 6.25E+07 | 1.57E+05 |
| GAB16NB | 7.42E+07 | 3.80E+06 | 7.04E+07 | 1.09E+04 |
| GAB16NB | 7.59E+07 | 4.06E+06 | 7.18E+07 | 8.63E+03 |
| GAB16NS | 1.46E+08 | 9.86E+07 | 4.75E+07 | 6.07E+03 |
| GAB16NS | 1.13E+08 | 8.77E+07 | 2.50E+07 | 1.60E+03 |
| GAB2713 | 9.26E+07 | 6.95E+07 | 2.31E+07 | 1.86E+03 |
| GAB2713 | 6.83E+07 | 4.67E+07 | 2.16E+07 | 8.95E+02 |
| GAB2723 | 1.46E+08 | 1.36E+07 | 1.32E+08 | 2.57E+06 |
| GAB2723 | 1.36E+08 | 2.23E+07 | 1.14E+08 | 2.10E+06 |
| GAB27NB | 1.30E+08 | 3.45E+07 | 9.56E+07 | 2.04E+05 |
| GAB27NB | 1.50E+08 | 4.56E+07 | 1.04E+08 | 1.32E+05 |
| GAB27NS | 9.80E+08 | 7.81E+08 | 2.00E+08 | 9.75E+04 |
| GAB27NS | 1.06E+09 | 8.98E+08 | 1.62E+08 | 1.46E+05 |

# Eastern Mediterranean

|         |          |          |          |          |
|---------|----------|----------|----------|----------|
| NDMS001 | 2.13E+08 | 2.13E+08 | 3.07E+03 | 9.28E+00 |
| NDMS001 | 3.27E+08 | 3.27E+08 | 3.71E+03 | 9.88E+00 |
| NDMS002 | 3.18E+07 | 2.05E+07 | 1.14E+07 | 7.18E+03 |
| NDMS002 | 4.03E+07 | 2.91E+07 | 1.12E+07 | 5.36E+03 |
| NDMS003 | 1.55E+07 | 8.14E+06 | 7.36E+06 | 4.04E+04 |
| NDMS003 | 1.90E+07 | 1.11E+07 | 7.90E+06 | 4.45E+04 |
| NDMS004 | 3.30E+06 | 5.40E+05 | 2.76E+06 | 2.53E+03 |
| NDMS004 | 3.73E+06 | 1.09E+06 | 2.64E+06 | 1.19E+03 |
| NDMS006 | 3.21E+06 | 1.45E+06 | 1.76E+06 | 6.24E+03 |
| NDMS006 | 4.32E+06 | 2.33E+06 | 1.99E+06 | 2.73E+03 |
| NDMS007 | 2.10E+06 | 6.77E+05 | 1.42E+06 | 2.85E+02 |
| NDMS007 | 2.15E+06 | 6.90E+05 | 1.46E+06 | 2.98E+02 |
| NDMS008 | 2.24E+07 | 1.01E+07 | 1.23E+07 | 8.15E+04 |
| NDMS008 | 1.56E+07 | 3.47E+06 | 1.22E+07 | 6.25E+04 |
| NDMS009 | 1.76E+08 | 1.75E+08 | 3.97E+05 | 1.63E+02 |
| NDMS009 | 1.93E+08 | 1.92E+08 | 4.56E+05 | 2.69E+01 |
| NDMS011 | 6.56E+04 | 5.74E+02 | 6.50E+04 | 7.29E+01 |
| NDMS012 | 3.19E+07 | 1.53E+07 | 1.66E+07 | 4.73E+03 |
| NDMS012 | 3.43E+07 | 2.00E+07 | 1.43E+07 | 4.89E+03 |
| NDMS013 | 1.72E+08 | 8.98E+07 | 8.22E+07 | 2.62E+05 |
| NDMS013 | 1.77E+08 | 1.01E+08 | 7.64E+07 | 2.61E+05 |
| NDMS014 | 4.02E+08 | 4.02E+08 | 2.53E+05 | 7.06E+00 |
| NDMS014 | 2.73E+08 | 2.73E+08 | 2.59E+05 | 9.30E+01 |
| NDMS016 | 1.28E+05 | 7.64E+03 | 1.20E+05 | 3.85E+01 |
| NDMS016 | 3.68E+05 | 6.26E+04 | 3.05E+05 | 3.10E+02 |
| NDMS017 | 2.14E+07 | 5.05E+06 | 1.64E+07 | 1.03E+03 |
| NDMS017 | 2.32E+07 | 5.94E+06 | 1.73E+07 | 1.60E+03 |
| NDMS018 | 3.66E+07 | 2.58E+07 | 1.08E+07 | 1.24E+05 |
| NDMS018 | 3.53E+07 | 2.38E+07 | 1.15E+07 | 1.03E+05 |
| NDMS019 | 4.19E+08 | 4.18E+08 | 9.87E+05 | 8.42E+02 |
| NDMS019 | 3.75E+08 | 3.74E+08 | 1.01E+06 | 3.30E+02 |
| NDMS021 | 6.90E+05 | 2.36E+05 | 4.54E+05 | 2.61E+02 |
| NDMS021 | 7.40E+05 | 2.02E+05 | 5.38E+05 | 7.68E+01 |
| NDMS022 | 4.66E+06 | 1.09E+06 | 3.57E+06 | 5.41E+02 |
| NDMS022 | 5.91E+06 | 1.09E+06 | 4.82E+06 | 7.37E+02 |
| NDMS023 | 3.58E+07 | 1.45E+07 | 2.13E+07 | 9.41E+04 |
| NDMS023 | 3.86E+07 | 1.76E+07 | 2.10E+07 | 9.67E+04 |
| NDMS024 | 3.88E+08 | 3.87E+08 | 5.05E+05 | 9.20E+02 |
| NDMS024 | 4.22E+08 | 4.22E+08 | 5.17E+05 | 9.62E+02 |



Supplementary Table 3: Statistics comparing log abundance of gene copy numbers as determined by qPCR.

|                      | F Stat | p-value | Caspian v. GAB | Caspian v. E. Med | Caspian v. C. Med | GAB v. E. Med | GAB v. C. Med | E. Med v C. Med |
|----------------------|--------|---------|----------------|-------------------|-------------------|---------------|---------------|-----------------|
| Total Prokaryotes    | 9.339  | <0.0001 | 0.43           | 0.057             | 0.021             | 0.0002        | <0.0001       | 0.95            |
| Bacterial 16S rRNA   | 5.916  | 0.0008  | 0.233          | 0.0038            | 0.0018            | 0.36          | 0.2           | 0.97            |
| Archaeal 16S rRNA    | 53.05  | <0.0001 | <0.0001        | 0.0001            | <0.0001           | <0.0001       | <0.0001       | 0.21            |
| Archaeal <i>amoA</i> | 32.46  | <0.0001 | 0.006          | <0.0001           | <0.0001           | <0.0001       | 0.0009        | 0.34            |

Supplementary Table 4: Statistics comparing alpha diversity metrics for each basin

|            | F Stat | p value | Caspian v. E. Med | Caspian v. C. Med | Caspian v. GAB | E. Med v. GAB | E. Med v. C. Med | C. Med v. GAB |
|------------|--------|---------|-------------------|-------------------|----------------|---------------|------------------|---------------|
| Faiths' PD | 76.98  | <0.0001 | 0                 | <0.0001           | 0              | 0.44          | 0.005            | 0.08          |
| Chao1      | 83.86  | <0.0001 | 0                 | <0.0001           | 0              | 0.15          | 0.001            | <0.0001       |
| Simpson    | 36.08  | <0.0001 | 0                 | <0.0001           | 0              | 0.99          | 0.97             | 0.97          |
| Shannon    | 116.9  | <0.0001 | 0                 | 0                 | 0              | 0.96          | 0.017            | 0.037         |

Supplementary Table 5: Pairwise PERMANOVA comparing basins. Lower triangle is PERMANOVA p values and upper triangle is R<sup>2</sup> values.

|         | CMS   | C. Med. | E. Med. | GAB    |
|---------|-------|---------|---------|--------|
| CMS     |       | 0.5069  | 0.5884  | 0.4952 |
| C. Med. | 0.001 |         | 0.1344  | 0.2943 |
| E. Med. | 0.001 | 0.055   |         | 0.3455 |
| GAB     | 0.001 | 0.001   | 0.001   |        |

Supplementary Table 6: PERMANOVA Comparison of Geochemistry of samples from the Eastern Mediterranean with the Central Mediterranean

|                      | F Model | R2      | p value |
|----------------------|---------|---------|---------|
| E. Med versus C. Med | 1.0324  | 0.02947 | 0.331   |

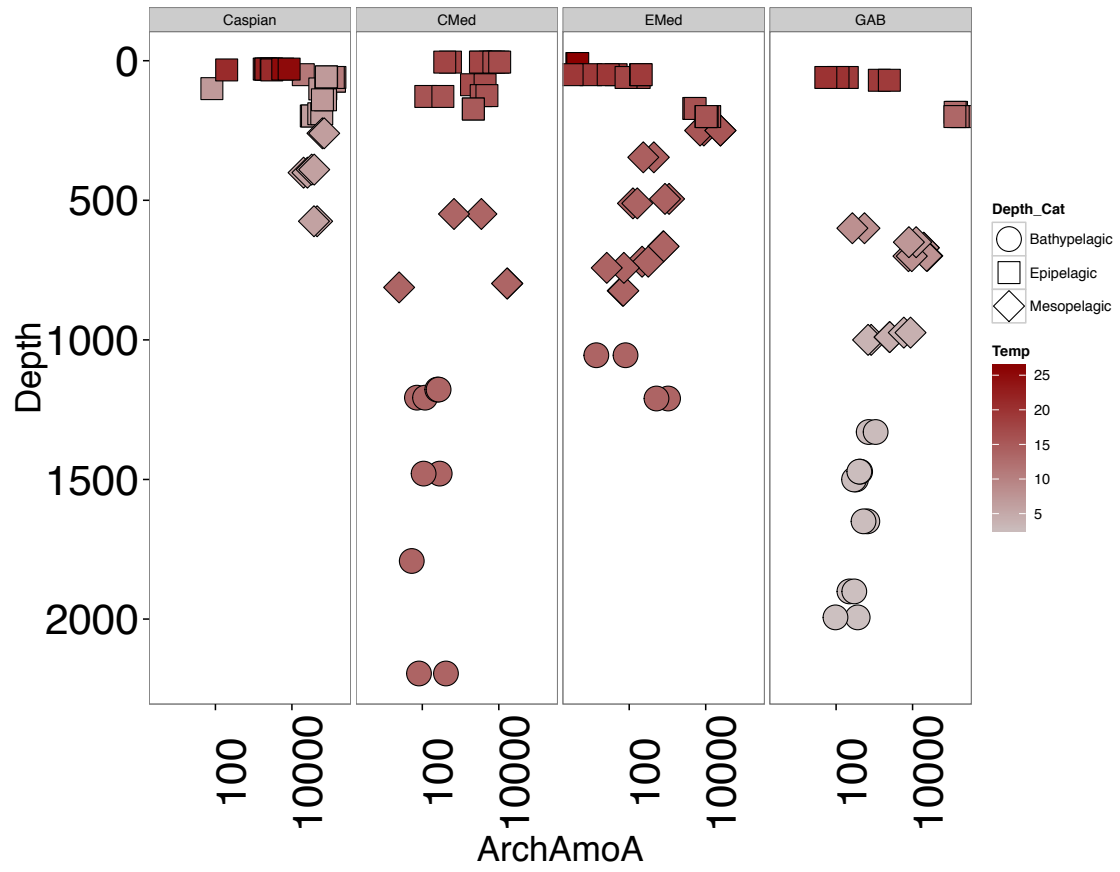

Supplementary Figure 1: Abundance of Archaeal amoA genes as function of depth in each basin.



# NMDS of Bray Curtis Presence Absence Thaumarchaeota

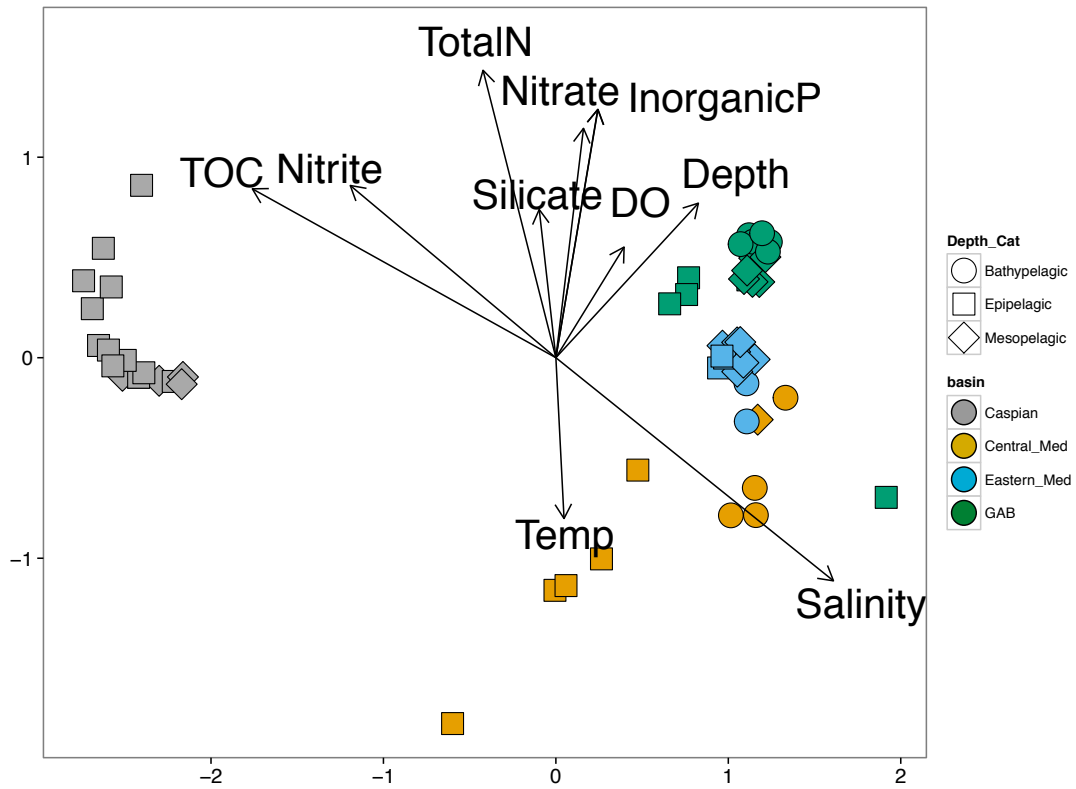

Supplementary Figure 3: Non-metric multidimensional scaling of Bray Curtis dissimilarity determined from an oligotype presence absence matrix. Samples colored according to basin.

### PCA of Geochemical Variables from four basins

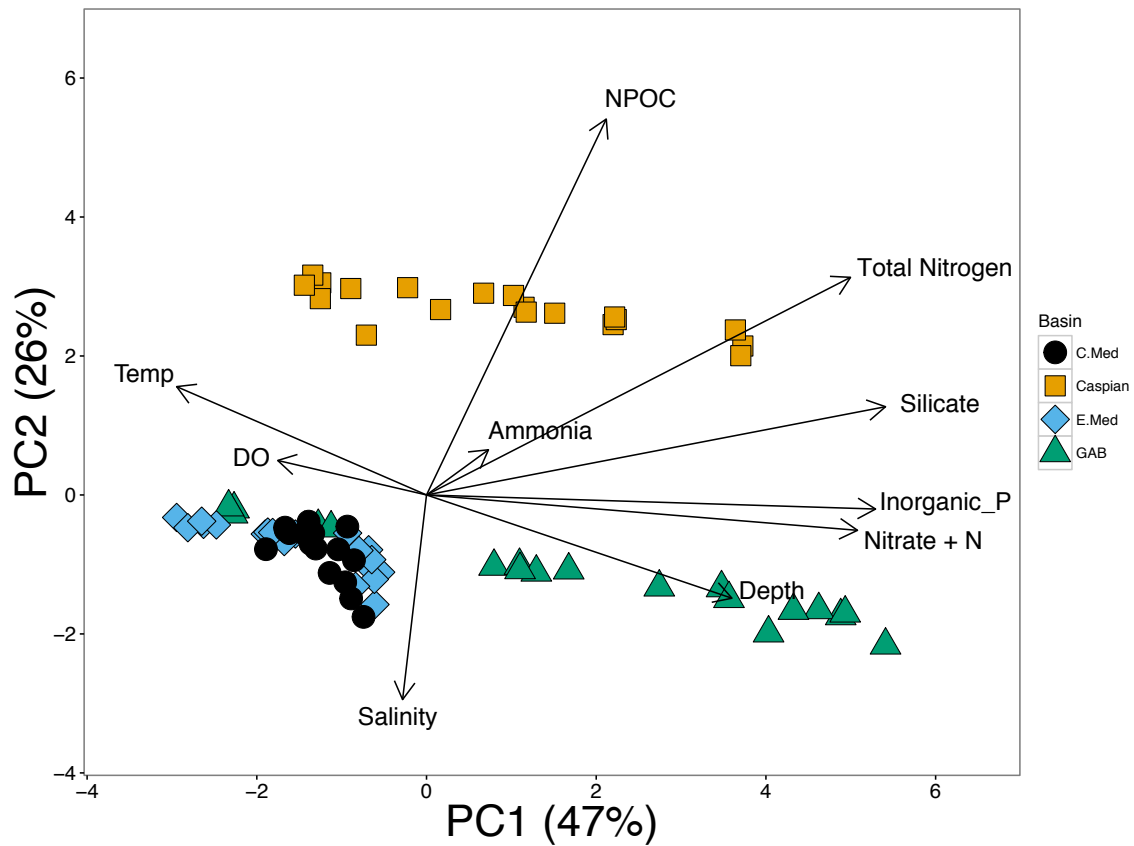

Supplementary Figure 4: Principle component analysis of Euclidian distances comparing physical and chemical variables between these four basins.
